# Supplementary material
Source: PubMed Central journal article supplement (PMC9663907)
Supplement: mmc1.pdf [file mmc1.pdf]

## **Supplemental information**

### **Kinetics of immune responses elicited after three mRNA COVID-19 vaccine doses in predominantly antibody-deficient individuals**

**Erola Ainsua-Enrich, Núria Pedreño-Lopez, Carmen Bracke, Carlos Ávila-Nieto, María Luisa Rodríguez de la Concepción, Edwards Pradenas, Benjamin Trinité, Silvia Marfil, Cristina Miranda, Sandra González, Ruth Toledo, Marta Font, Susana Benet, Tuixent Escribà, Esther Jimenez-Moyano, Ruth Peña, Samandhy Cedeño, Julia G. Prado, Beatriz Mothe, Christian Brander, Nuria Izquierdo-Useros, Julia Vergara-Alert, Joaquim Segalés, Marta Massanella, Rosa María Benitez, Alba Romero, Daniel Molina-Morant, Julià Blanco, Bonaventura Clotet, Lourdes Mateu, María Luisa Pedro-Botet, and Jorge Carrillo**

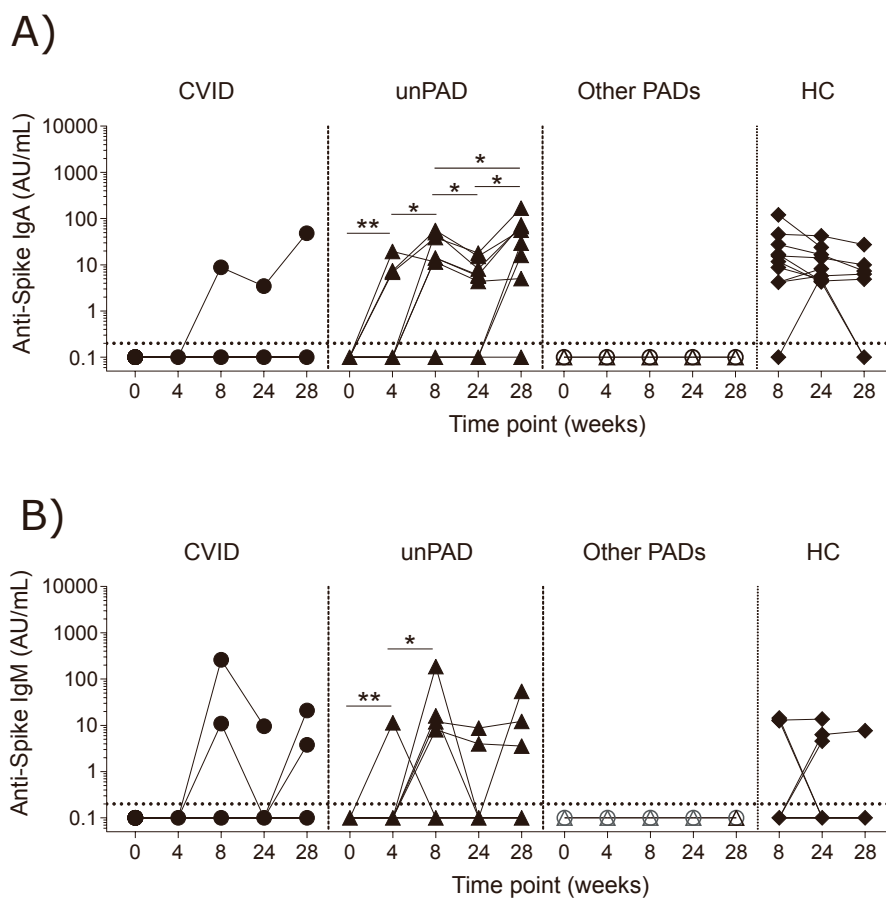

**SUPPLEMENTAL FIG 1. Kinetics of Anti-Spike IgM and IgA responses in vaccinated PAD patients, related to Figure 1.** Vaccine-induced IgA (A) and IgM (B) titers in CVID (n=12, black circles), unPAD (n=9, black triangles), other PADs (CID: n=1, open triangles and TID: n=1, open circles), and HC groups (n=10, black diamonds) after vaccination. Data were analyzed using Wilcoxon signed rank test \* P < .05; \*\* P < .01.

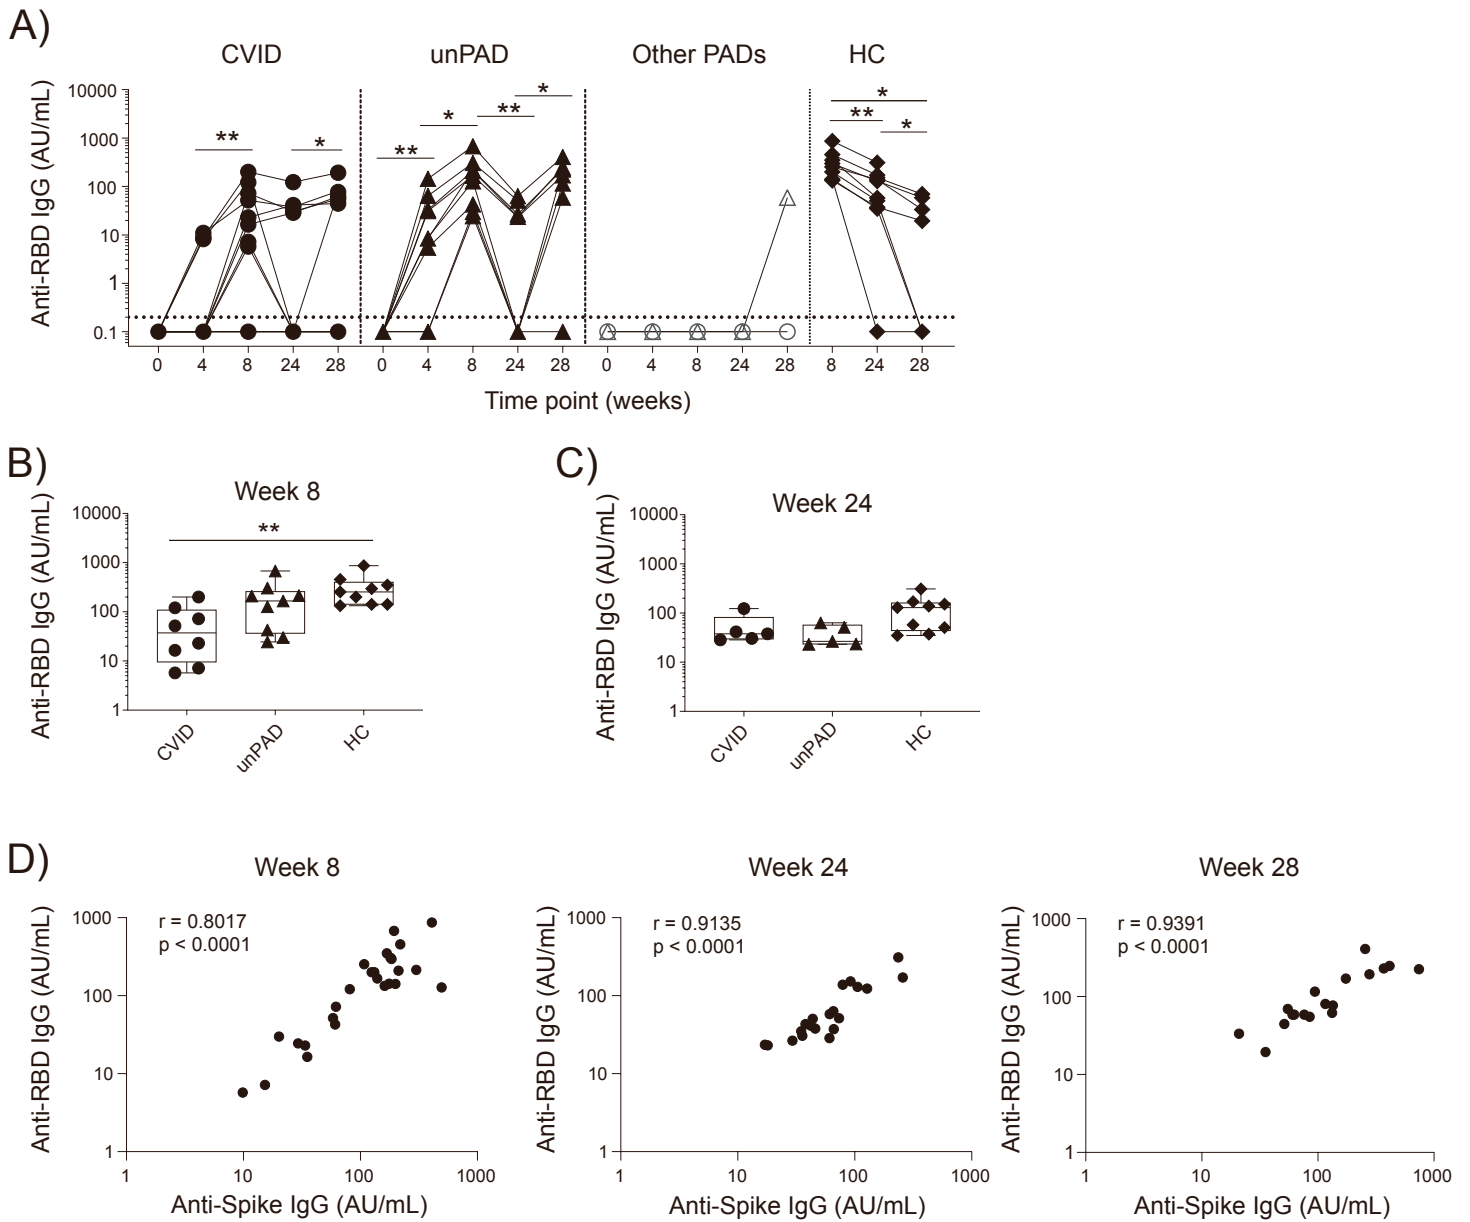

**SUPPLEMENTAL FIG 2. Kinetics of RBD-specific IgG responses in vaccinated PAD patients, related to Figure 1.** **A)** Levels of anti-RBD IgG antibodies were determined in CVID (n=12, black circles), unPAD (n=9, black triangles), other PAD (CID: n=1, open triangles and TID: n=1, open circles) and HC groups (n=10, black diamonds) after vaccination. Comparison of RBD-specific IgG levels among CVID, unPAD, and HC groups at w8 (**B**), and w24 (**C**) after the first vaccine dose. **D)** Correlation between anti-RBD and anti-Spike IgG levels, which was determined using Spearman's rank correlation. Data in A was analyzed using Wilcoxon signed rank test. Data in B and C were analyzed using Dunn's Multiple Comparison Test. \* P < .05; \*\* P < .01; \*\*\*P<.001.

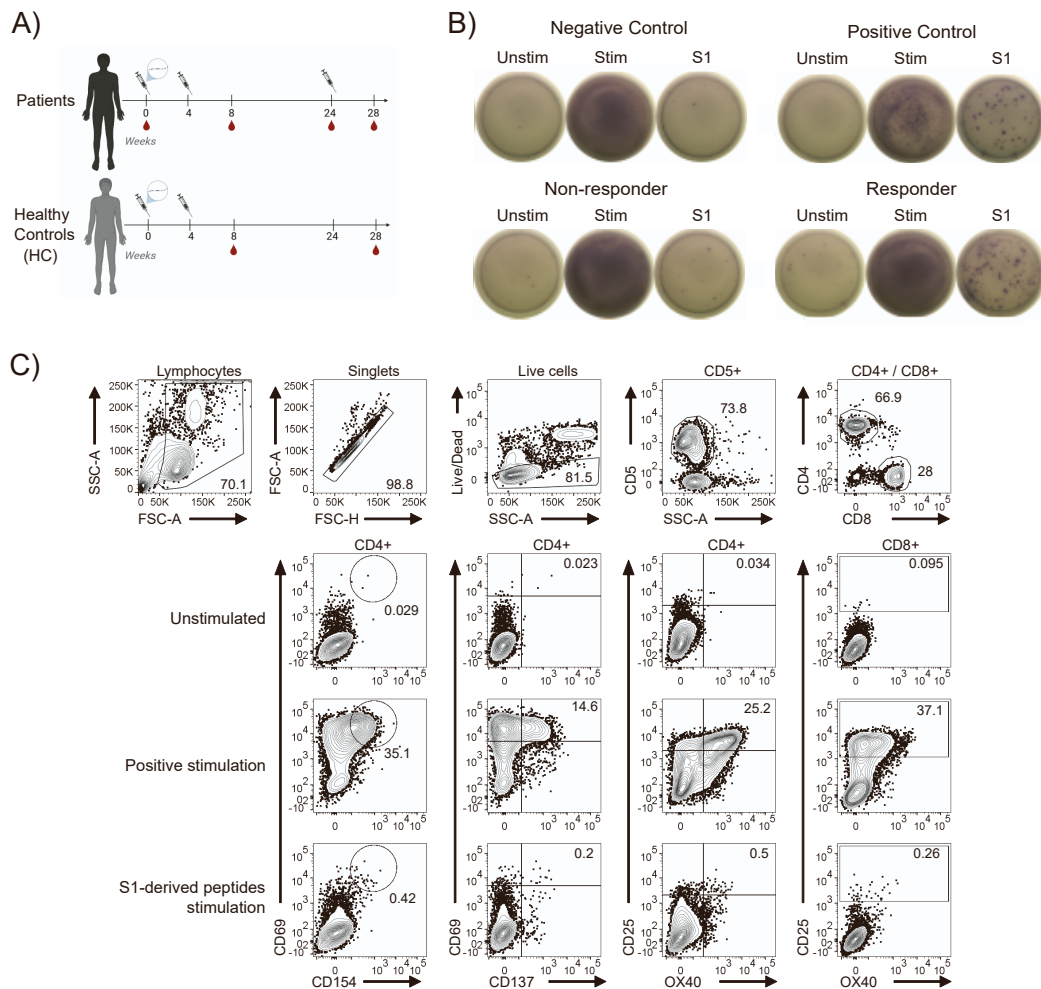

**SUPPLEMENTAL FIG 3. Characterization of vaccine-induced cellular immune response in PAD patients, related to Figure 4, 5 and 6. A)** Vaccine regimen timeline and sample collection. **B)** Representative examples of IFN- $\gamma$  ELISpot. **C)** Gating strategy used to determine activation-induced markers in both CD8+ and CD4+ T cells after PBMC stimulation with S1-derived peptides for 16 hours: lymphocytes / live / CD5+ / CD4+ or CD8+ / CD69+CD154+; CD69+CD137+; CD25+OX40+. A representative analysis is shown using all three stimulation conditions: unstimulated (Unstim), positive control stimulated using cytoestim (Stim, Miltenyi Biotec), and S1 peptides (S1, Miltenyi Biotec).

**SUPPLEMENTAL Table 1. Vaccine-induced adverse effects in SARS-CoV-2-uninfected PAD patients, related to Table 1.**

| <b>Adverse events</b> | <b>First dose</b> | <b>Second dose</b> | <b>Third dose</b> |
|-----------------------|-------------------|--------------------|-------------------|
| Local pain            | 19 (82.6%)        | 21 (91.3%)         | 19 (82.6%)        |
| Local blush           | 2 (8.7%)          | 4 (17.4 %)         | 6 (26%)           |
| Local inflammation    | 2 (8.7%)          | 5 (21.7%)          | 7 (30.4%)         |
| Paresthesia           | 0 (0%)            | 1 (4.4%)           | 1 (4.4%)          |
| Headache              | 5 (21.7%)         | 6 (26%)            | 7 (30.4%)         |
| Shivers               | 3 (13%)           | 8 (34.8%)          | 10 (43.5%)        |
| Arthromyalgia         | 2 (8.7%)          | 10 (43.5%)         | 9 (39.1%)         |
| Asthenia              | 7 (30.4%)         | 11 (47.8%)         | 13 (56.6%)        |
| Dizziness             | 0 (0%)            | 3 (13%)            | 3 (13%)           |
| Syncope               | 0 (0%)            | 0 (0%)             | 0 (0%)            |
| Nausea/vomiting       | 1 (4.4%)          | 2 (8.7%)           | 1 (4.4%)          |
| Diarrhea              | 2 (8.7%)          | 1 (4.4%)           | 3 (13%)           |
| Fever                 | 1 (4.4%)          | 8 (34.8%)          | 9 (39.1%)         |
| Local adenopathy      | 0 (0%)            | 0 (0%)             | 1 (4.4%)          |
| Anaphylaxis           | 0 (0%)            | 0 (0%)             | 0 (0%)            |
| Other adverse events  | 2 (8.7%)          | 4 (17.4%)          | 5 (21.7%)         |
| Medical assistance    | 0 (0%)            | 1 (4.4%)           | 0 (0%)            |
| Sick leave            | 0 (0%)            | 1 (4.4%)           | 0 (0%)            |
| Days of sick leave    | 0                 | 3                  | 0                 |
| Hospitalization       | 0 (0%)            | 0 (0%)             | 0 (0%)            |
